# Supplementary material for: Does schooling protect sexual health? The association between three measures of education and STIs among adolescents in Malawi
Source: PubMed Central journal article supplement (PMC7162723; doi:10.1080/00324728.2019.1656282), 2019-10-17
Supplement: NIHMS1047630-supplement-Supplementary_Material.pdf [file NIHMS1047630-supplement-Supplementary_Material.pdf]

**Supplementary Material to: Does schooling protect sexual health? The association between three measures of education and sexually transmitted infections among adolescents in Malawi - Barbara S. Mensch, Monica J. Grant, Erica Soler-Hampejsek, Christine A. Kelly, Satvika Chalasani and Paul C. Hewett *Population Studies*. 2019.**

**Summary of results and robustness checks for interval-censored regression models, Malawi Schooling and Adolescent Survey, 2007–13**

**A. Models with enrollment and attainment: full sample N = 1166 boys and 1226 girls for HSV-2 and N=1194 boys and 1253 girls for HIV (Tables 2 and 3 in paper)**

|                        | HSV-2<br>(assume negative at age 14) |    |        |    | HIV<br>(assume negative at age 14) |    |        |    | HIV<br>(assume negative at age 16) |    |        |    |
|------------------------|--------------------------------------|----|--------|----|------------------------------------|----|--------|----|------------------------------------|----|--------|----|
|                        | Boys                                 |    | Girls  |    | Boys                               |    | Girls  |    | Boys                               |    | Girls  |    |
| In school              | 0.313                                | †  | -0.004 | NS | 0.025                              | NS | -0.036 | NS | -0.099                             | NS | -0.512 | NS |
| Highest grade attained | -0.090                               | ** | -0.073 | ** | -0.046                             | NS | -0.151 | *  | -0.063                             | NS | -0.112 | †  |

† p<0.10, \*p<0.05 \*\*p<0.01

**B. Models with enrollment or attainment: full sample N = 1166 boys and 1226 girls N=1194 boys and 1253 girls for HIV**

|                                             | HSV-2<br>(assume negative at age 14) |    |        |    | HIV<br>(assume negative at age 14) |    |        |    | HIV<br>(assume negative at age 16) |    |        |    |
|---------------------------------------------|--------------------------------------|----|--------|----|------------------------------------|----|--------|----|------------------------------------|----|--------|----|
|                                             | Boys                                 |    | Girls  |    | Boys                               |    | Girls  |    | Boys                               |    | Girls  |    |
| In school (highest grade attained excluded) | 0.155                                | NS | -0.071 | NS | -0.085                             | NS | -0.189 | NS | -0.283                             | NS | -0.715 | *  |
| Highest grade attained (in school excluded) | -0.069                               | *  | -0.074 | ** | -0.043                             | NS | -0.153 | ** | -0.075                             | NS | -0.151 | ** |

\*p<0.05 \*\*p<0.01

**C. Models with enrollment, attainment and skills: sample limited to those age 14 at baseline for HSV-2; N= 275 boys and 287 girls for HSV-2 and N=1194 boys and 1253 girls for HIV (Table 4 in paper)**

|                        | HSV-2<br>(assume negative at age 14) |    |        |    | HIV<br>(assume negative at age 16) |    |        |    |
|------------------------|--------------------------------------|----|--------|----|------------------------------------|----|--------|----|
|                        | Boys                                 |    | Girls  |    | Boys                               |    | Girls  |    |
| In school              | 0.361                                | NS | -0.319 | NS | -0.094                             | NS | -0.521 | †  |
| Highest grade attained | 0.095                                | NS | -0.135 | NS | -0.041                             | NS | -0.147 | †  |
| Numeracy               | -0.067                               | NS | 0.046  | NS | -0.022                             | NS | 0.049  | NS |
| Chichewa Literacy      | -0.042                               | NS | 0.503  | NS | N/A                                |    | -0.234 | NS |

† p<0.10 N/A= model would not converge with literacy

**D. Models with enrollment and numeracy and literacy (grade attainment excluded): sample limited to those age 14 at baseline for HSV-2; N= 275 boys and 287 girls and N=1194 boys and 1253 girls for HIV**

|                   | HSV-2<br>(assume negative at age 14) |    |        |    | HIV<br>(assume negative at age 16) |    |        |    |
|-------------------|--------------------------------------|----|--------|----|------------------------------------|----|--------|----|
|                   | Boys                                 |    | Girls  |    | Boys                               |    | Girls  |    |
| In school         | 0.525                                | NS | -0.419 | NS | -0.175                             | NS | -0.647 | *  |
| Numeracy          | -0.046                               | NS | -0.001 | NS | -0.035                             | NS | 0.003  | NS |
| Chichewa Literacy | 0.071                                | NS | 0.393  | NS | N/A                                |    | -0.366 | NS |

\*p<0.05 N/A=model would not converge with literacy

**E. Models with grade attainment and numeracy and literacy (enrollment excluded): sample limited to those age 14 at baseline for HSV-2; N= 275 boys and 287 girls and N=1194 boys and 1253 girls for HIV**

|                        | HSV-2<br>(assume negative at age 14) |    |        |    | HIV<br>(assume negative at age 16) |    |        |    |
|------------------------|--------------------------------------|----|--------|----|------------------------------------|----|--------|----|
|                        | Boys                                 |    | Girls  |    | Boys                               |    | Girls  |    |
| Highest grade attained | 0.125                                | NS | -0.158 | †  | -0.175                             | NS | -0.181 | *  |
| Numeracy               | -0.059                               | NS | 0.042  | NS | -0.035                             | NS | 0.045  | NS |
| Chichewa Literacy      | -0.021                               | NS | 0.500  | NS | N/A                                |    | -0.240 | NS |

† p<0.10, \*p<0.05 N/A=model would not converge with literacy

**F. Models with numeracy or literacy (grade attainment and enrollment excluded): sample limited to those age 14 at baseline for HSV-2; (N= 275 boys and 287 girls and N=1194 boys and 1253 girls for HIV )**

|                                       | HSV-2<br>(assume negative at age 14) |    |        |    | HIV<br>(assume negative at age 16) |    |        |    |
|---------------------------------------|--------------------------------------|----|--------|----|------------------------------------|----|--------|----|
|                                       | Boys                                 |    | Girls  |    | Boys                               |    | Girls  |    |
| Numeracy (Chichewa Literacy excluded) | -0.010                               | NS | 0.0077 | NS | -0.044                             | NS | -0.046 | NS |
| Chichewa Literacy (Numeracy excluded) | 0.065                                | NS | 0.238  | NS | N/A                                |    | -0.510 | †  |

† p<0.10, N/A=model would not converge with literacy

**G. Models with numeracy and literacy (grade attainment and enrollment excluded): sample limited to those age 14 at baseline for HSV-2; (N= 275 boys and 287 girls and N=1194 boys and 1253 girls for HIV )**

|                   | HSV-2<br>(assume negative at age 14) |    |        |    | HIV<br>(assume negative at age 16) |  |        |    |
|-------------------|--------------------------------------|----|--------|----|------------------------------------|--|--------|----|
|                   | Boys                                 |    | Girls  |    | Boys                               |  | Girls  |    |
| Numeracy          | -0.021                               | NS | -0.018 | †  | N/A                                |  | -0.016 | NS |
| Chichewa Literacy | 0.171                                | NS | 0.356  | NS | N/A                                |  | -0.420 | NS |

N/A=model would not converge with literacy; boys model with numeracy alone is in F
